# Supplementary material for: Striking Phenotypic Variation yet Low Genetic Differentiation in Sympatric Lake Trout (Salvelinus namaycush)
Source: PLOS journal article supplement (doi:10.1371/journal.pone.0162325), 2016-09-28
Supplement: S8 (10.1371/journal.pone.0162325.s008) [file journal.pone.0162325.s008]

## Supplemental tables and figures for associations between genetic, morphological and ecological differentiation

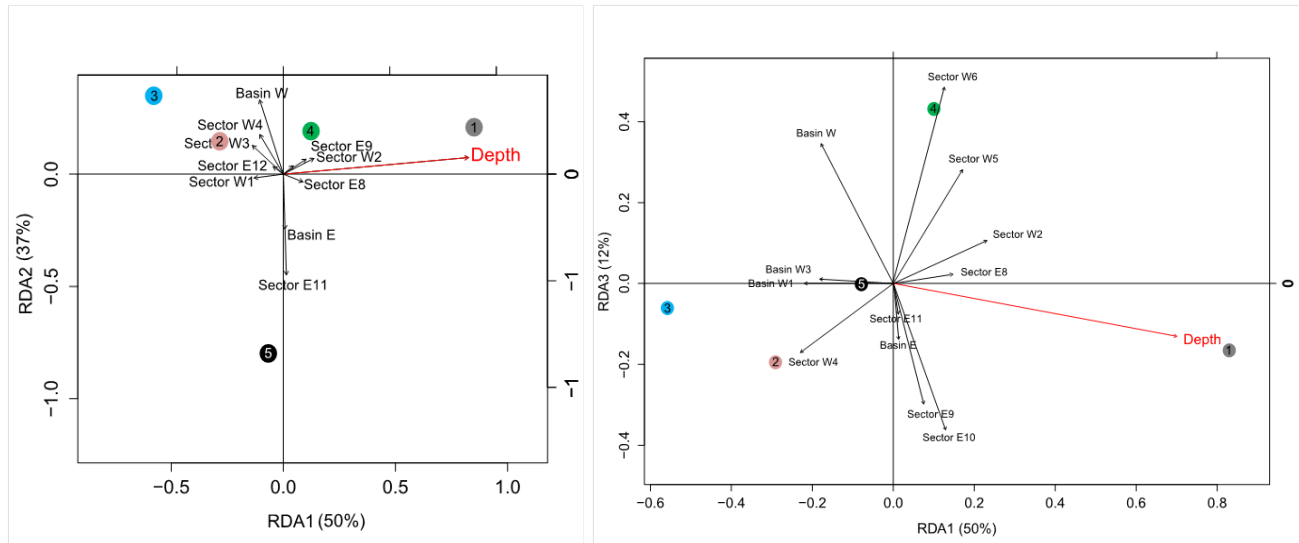

**Fig S8.1. Results of redundancy analysis (RDA) for the first three axes (99% of variation).** These results demonstrate that depth is significant with respect to the observed genetic population structuring. Coloured circles represent the 5 genetically-distinct lake trout clusters present in Mistassini Lake. Ecological variables (depth, basin and sector) and their associated arrows represent the nature of the relationship with respect to each cluster.

(A)

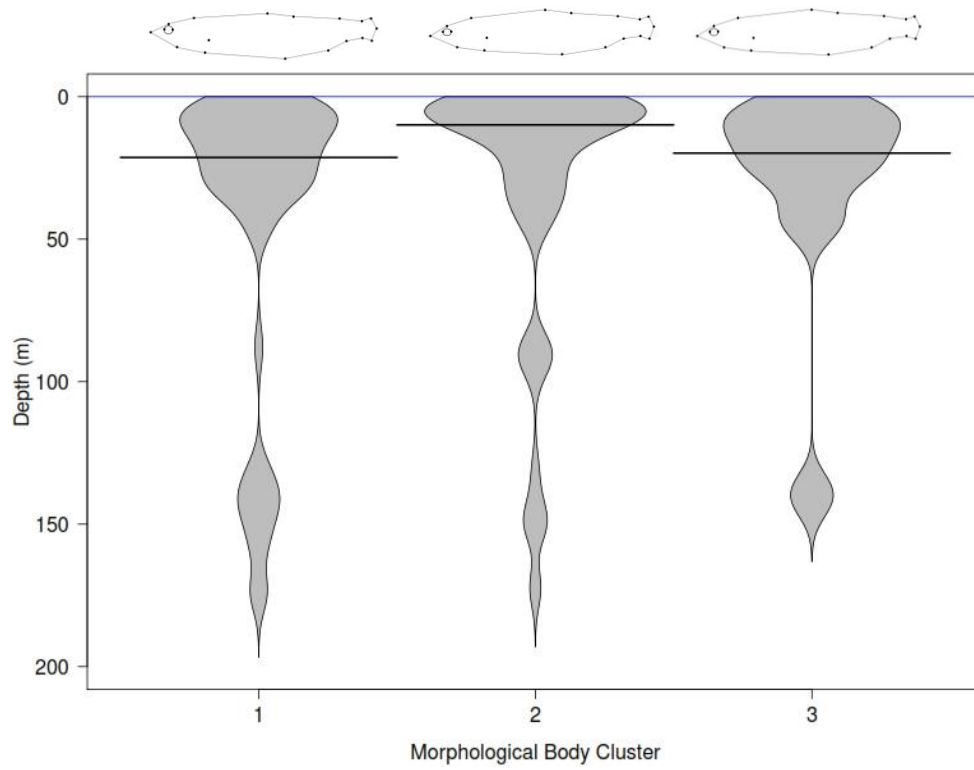

(B)

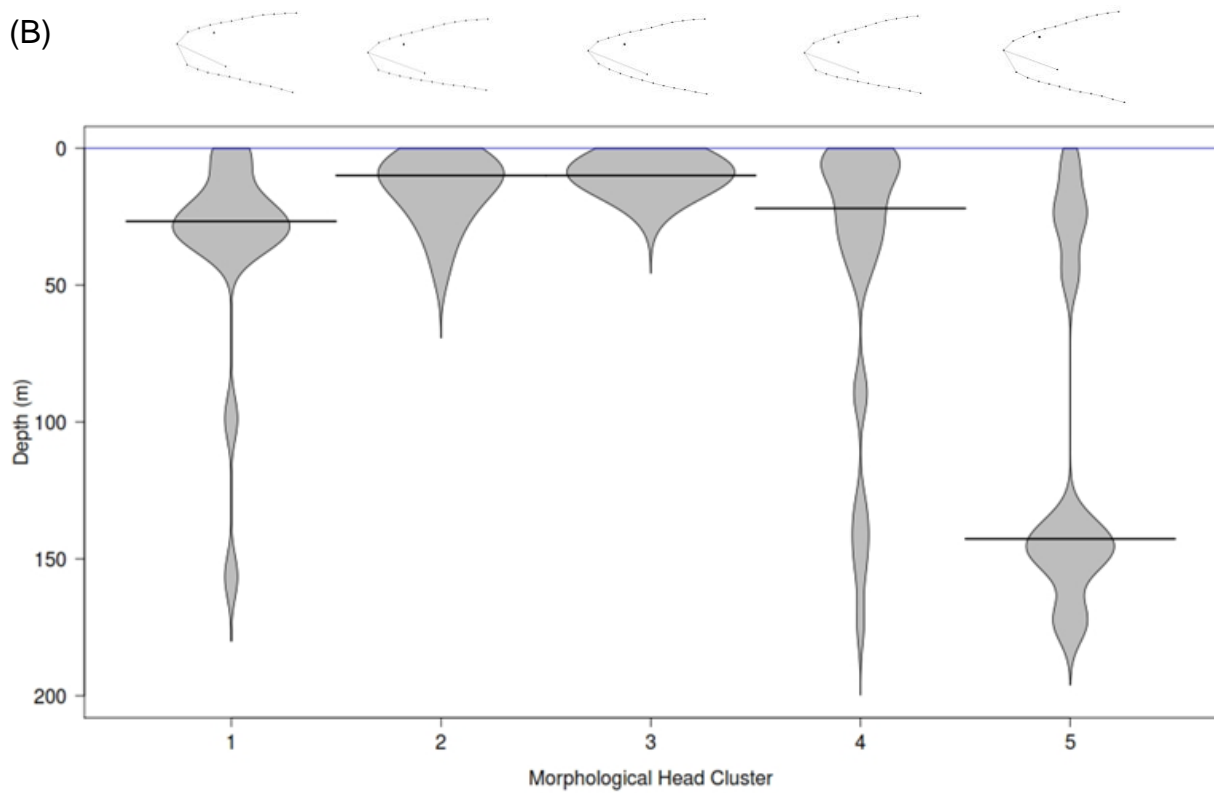

**Fig S8.2. Beanplot showing the depth variation for each lake trout morphological**

**cluster based on body (A) and head (B) shape.** The black line represents the median and inset images represent the consensus shape for morphological cluster identified in Mistassini Lake.

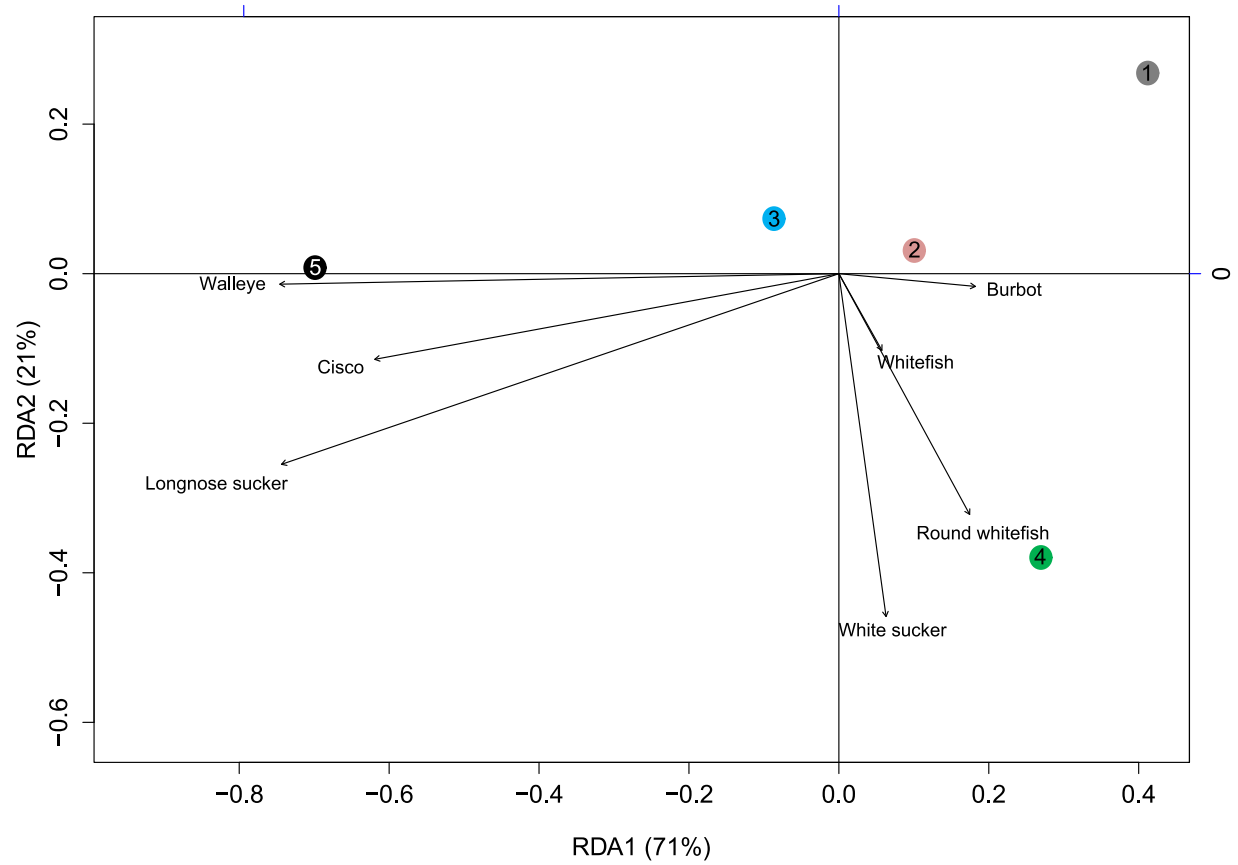

**Fig S8.3. Visualization of bycatch species association with each lake trout cluster (coloured circle) identified in Mistassini Lake.**

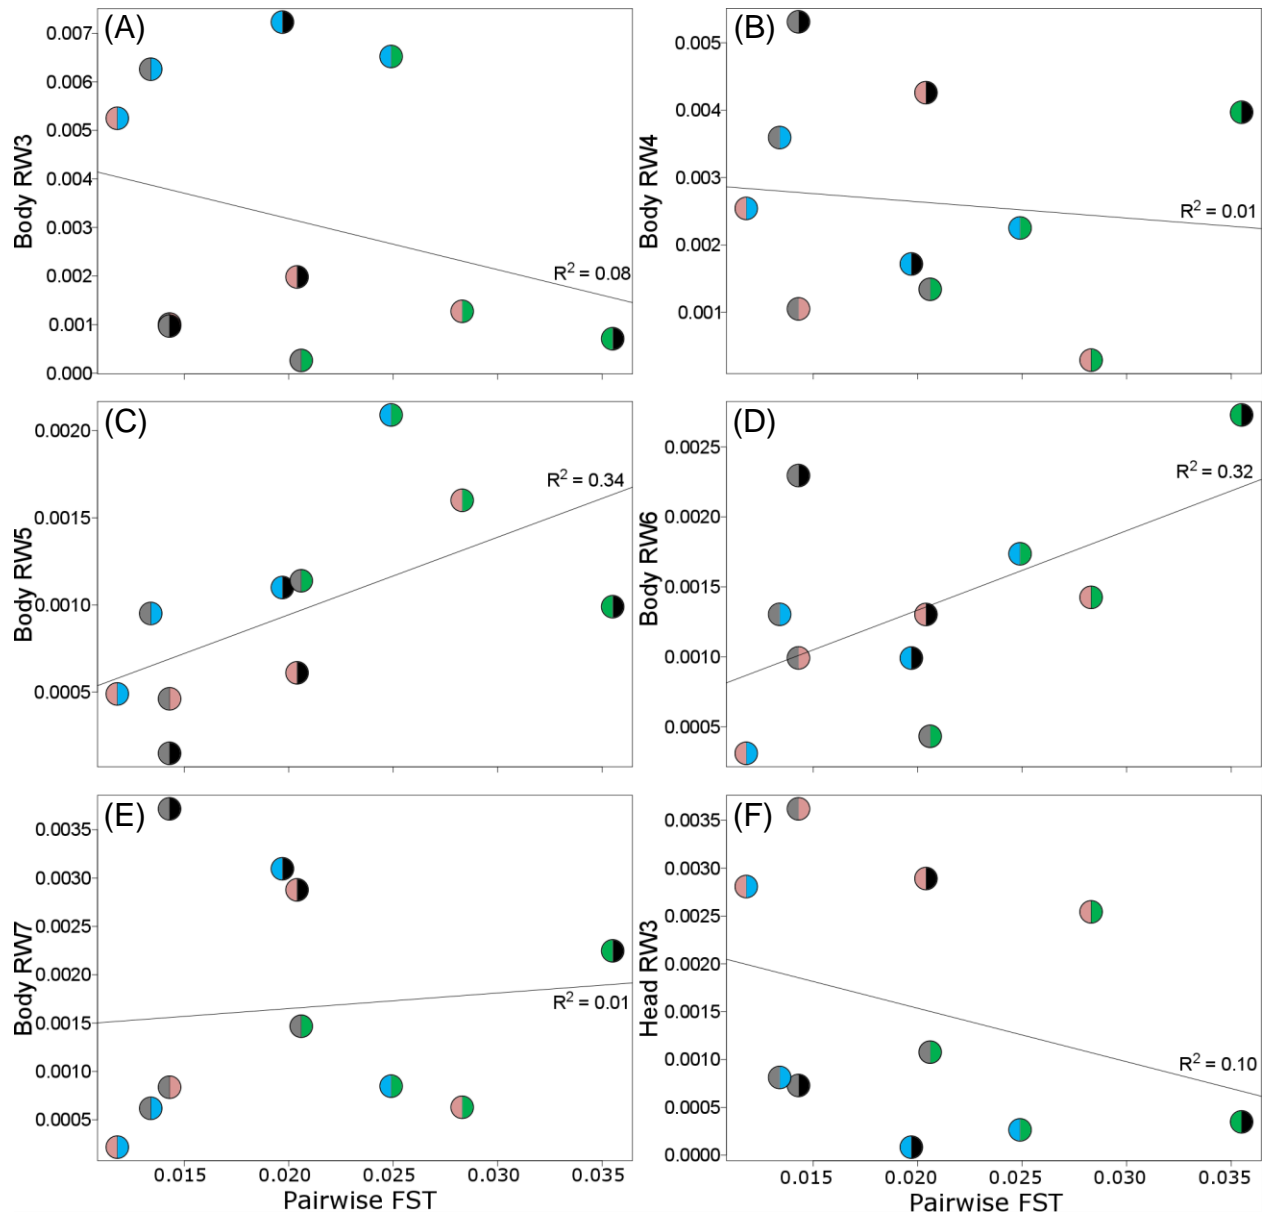

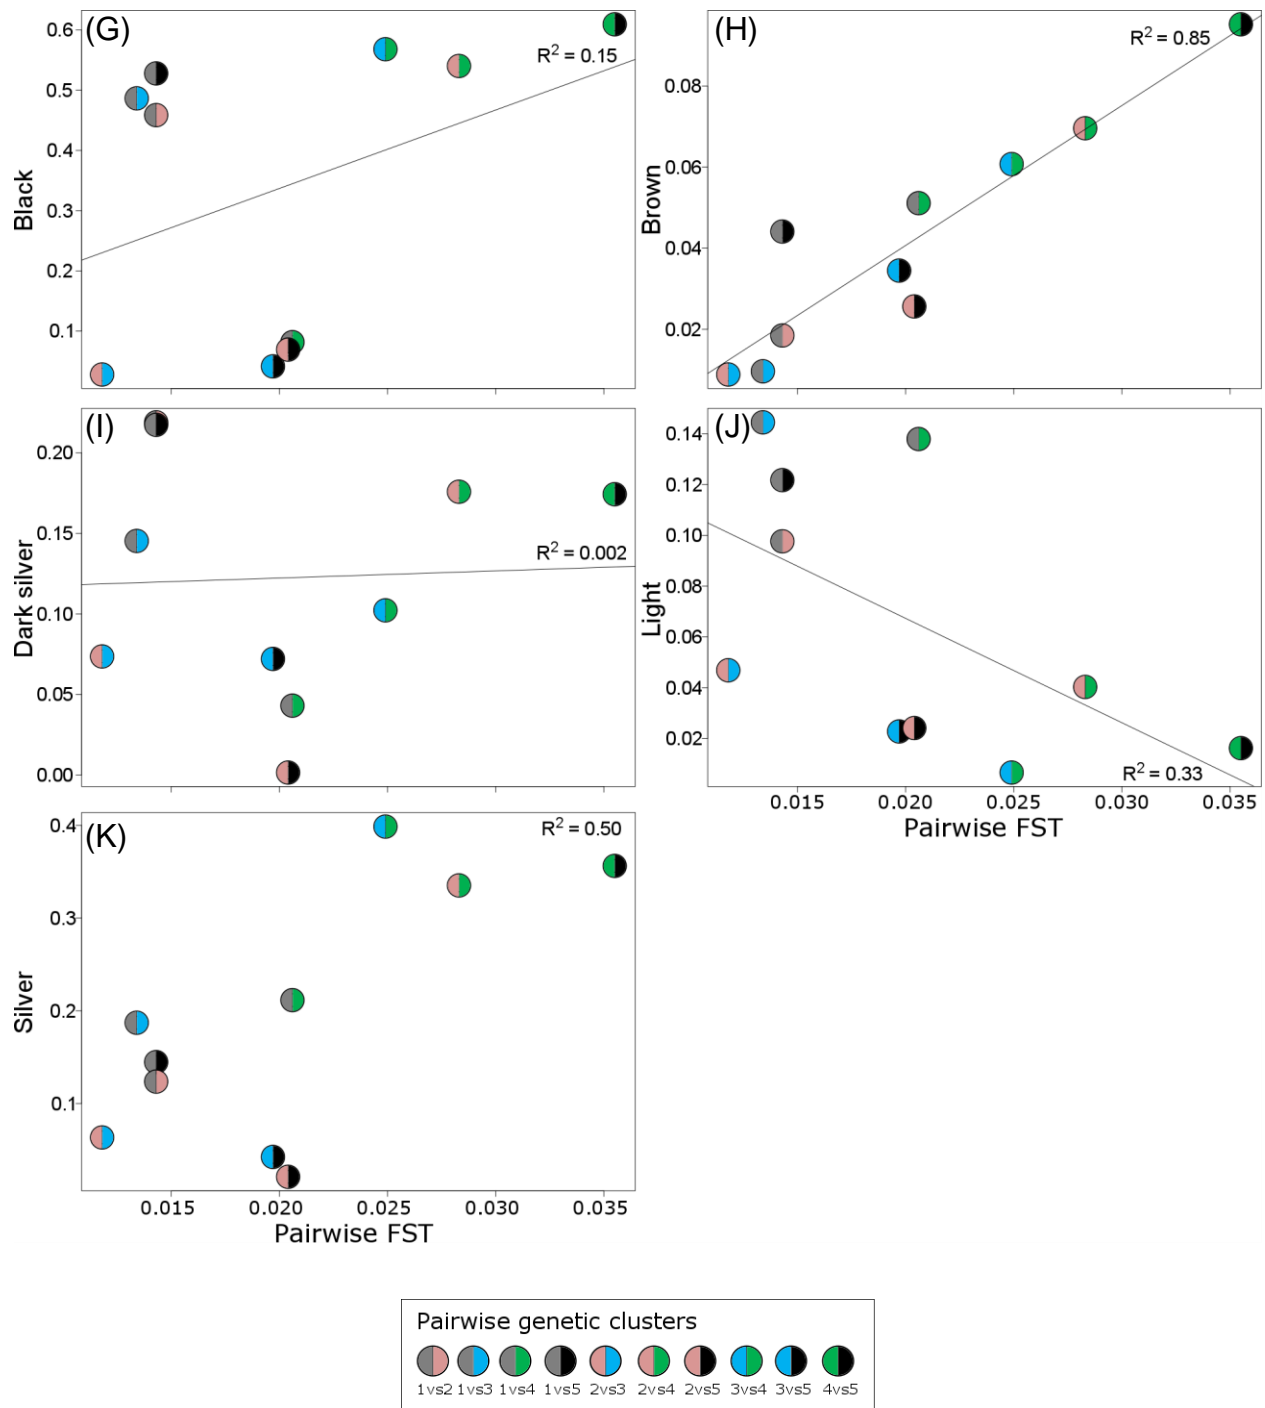

Fig. S8.4. Visualisations of the remaining Mantel tests between genetic distance and morphological and ecological variables. Shown is the genetic distance (pairwise  $F_{ST}$ ) vs.(i) the absolute difference in mean relative warp (RW) score for RW3 – 7 for body (A

– E); (ii) RW3 for body morphology (F); and the absolute difference in colour frequencies (G – K).

**Table 8.1. Results from Mantel tests between genetic distance and morphological and ecological variables.** Individual tests were between the genetic distance (pairwise  $F_{ST}$ ) and (i) the absolute difference in mean relative warp (RW) score for the first seven RWs for body and first three RWs for head morphology; (ii) the absolute difference in prey abundance; (iii) the absolute difference in median depth (m); and (iv) difference in observed colour frequencies. Bolded  $P$ -values indicate significance. The Mantel  $R$  statistic is based on Pearson's product-moment correlation.

| Pairwise $F_{ST}$ vs. | $P$ -value   | $R$    |
|-----------------------|--------------|--------|
| Body RW1              | 0.142        | 0.629  |
| Body RW2              | 0.233        | 0.544  |
| Body RW3              | 0.642        | -0.282 |
| Body RW4              | 0.600        | -0.113 |
| Body RW5              | 0.158        | 0.580  |
| Body RW6              | 0.083        | 0.566  |
| Body RW7              | 0.383        | 0.098  |
| Head RW1              | 0.250        | 0.342  |
| Head RW2              | 0.108        | 0.772  |
| Head RW3              | 0.667        | -0.322 |
| Bycatch               | 0.367        | 0.128  |
| Depth                 | 0.400        | 0.098  |
| Black                 | <b>0.017</b> | 0.392  |
| Brown                 | <b>0.008</b> | 0.927  |
| Dark silver           | 0.450        | 0.044  |
| Light                 | 0.958        | -0.575 |
| Silver                | 0.092        | 0.708  |
